# Supplementary material for: A novel method for detecting allura red based on triple-wavelength overlapping resonance Rayleigh scattering
Source: Royal Society of Chemistry journal article supplement (doi:10.1039/c4ra05401f), 2014-01-01
Supplement: c4ra05401f1.pdf [file c4ra05401f1.pdf]

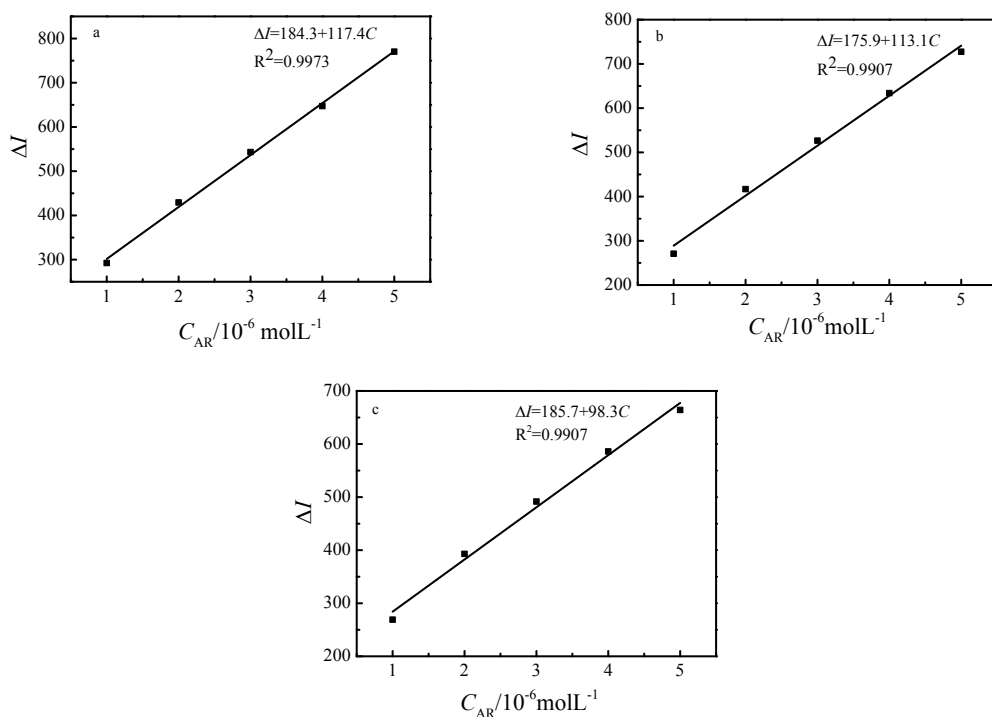

**Fig.1S.** Calibration graph of AR-EV system. (a)  $\lambda = 341 \text{ nm}$ ; (b)  $\lambda = 508 \text{ nm}$ ; (c)  $\lambda = 508 \text{ nm}$ ;  $C_{EV} = 1.6 \times 10^{-5} \text{ mol L}^{-1}$ ,  $C_{AR} = 1.0 \times 10^{-6}, 2.0 \times 10^{-6}, 3.0 \times 10^{-6}, 4.0 \times 10^{-6}, 5.0 \times 10^{-6} \text{ mol L}^{-1}$ , pH 10.0.

**Table 1S** Effects of reaction time. ( $C_{EV} = 1.6 \times 10^{-5} \text{ mol L}^{-1}$ ,  $C_{AR} = 5.0 \times 10^{-6} \text{ mol L}^{-1}$ , pH 10.0. )

| Time (min) | $\Delta I_{RRS}$ | Time (min) | $\Delta I_{RRS}$ |
|------------|------------------|------------|------------------|
| 5          | 928.7            | 30         | 777.1            |
| 10         | 852.0            | 40         | 775.8            |
| 15         | 815.6            | 50         | 773.5            |
| 20         | 780.3            | 60         | 750.9            |
| 25         | 782.7            | 70         | 721.4            |

**Table 2S** Effects of temperature. ( $C_{EV} = 1.6 \times 10^{-5} \text{ mol L}^{-1}$ ,  $C_{AR} = 5.0 \times 10^{-6} \text{ mol L}^{-1}$ , pH 10.0. )

| Temperature (°C) | $\Delta I_{RRS}$ |
|------------------|------------------|
| 10               | 781.2            |
| 20               | 783.4            |
| 30               | 774.1            |
| 40               | 780.9            |
| 50               | 776.7            |
